# Supplementary material for: Pt atoms on doped carbon nanosheets with ultrahigh N content as a superior bifunctional catalyst for hydrogen evolution/oxidation
Source: Royal Society of Chemistry journal article supplement (doi:10.1039/d0se01516d), 2020-11-06
Supplement: d0se01516d1.pdf [file d0se01516d1.pdf]

## Supporting Information

### **Pt atoms on doped carbon nanosheets with ultrahigh N content as a superior bifunctional catalyst for hydrogen evolution/oxidation**

Zhen Zhang <sup>a, b</sup>, Cheng Jiang <sup>b</sup>, Ping Li <sup>c</sup>, Qi Feng <sup>b</sup>, Zhiliang Zhao <sup>b</sup>, Keguang Yao <sup>b</sup>, Jiantao Fan <sup>b</sup>, Hui Li <sup>b\*</sup>, Haijiang Wang <sup>d</sup>

a School of Materials Science and Engineering, Harbin Institute of Technology, Harbin 150001, China

b Department of Materials Science and Engineering, Shenzhen Key Laboratory of Hydrogen Energy, Southern University of Science and Technology, Shenzhen 518055, Guangdong, China

c Center for Spintronics and Quantum Systems, State Key Laboratory for Mechanical Behavior of Materials, School of Materials Science and Engineering, Xi'an Jiaotong University, Xi'an, Shaanxi, 710049, China

d Department of Mechanical and Energy Engineering, Southern University of Science and Technology, Shenzhen, 518055, China

\*Corresponding author:

E-mail address: hui.li@sustech.edu.cn

Keywords: hydrogen evolution, hydrogen oxidation, single atom catalyst, electrolyzer, fuel cell

## Experimental Section

### 1. Three-electrode electrochemical measurements

For HER, the Tafel slopes were fitted based on the Tafel equation:

$$\eta = a + b \log(j) \quad (1)$$

where  $\eta$  (mV) indicates the applied overpotential,  $j$  (mA cm<sup>-2</sup>) denotes the current density, and  $b$  (mV dec<sup>-1</sup>) is the Tafel slope. Electrochemical double-layer capacitance ( $C_{dl}$ ) in 0.5 M H<sub>2</sub>SO<sub>4</sub> was used to determine the electrochemical active surface area (ECSA) of the prepared catalysts. The  $C_{dl}$  was detected from CV curves measured in the potential range of 0.15–0.25 V.  $C_{dl}$  was calculated according equation (2):

$$C_{dl} = \Delta j / 2\nu \quad (2)$$

where  $\Delta j = |j_a| - |j_c|$  and  $\nu$  is the scan rate. The values of  $j_a$  and  $j_c$  were taken at a potential of 0.2 V.

For HOR, the measured overall current ( $j$ ) is a combination of the kinetic ( $j_k$ ) and diffusional ( $j_d$ ) components. Based on previous reports, the current is proportional to the square root of the rotation speed, according to the Koutecky-Levich equation:

$$1/j = 1/j_k + 1/j_d \quad (3)$$

$$j_d = 0.62nFD^{2/3}\nu^{-1/6}c_0\omega^{1/2} \quad (4)$$

where  $j$  is the detectable current density,  $j_k$  is the kinetic current in the absence of mass transfer limitations, and  $j_d$  is the diffusion current density. Using equation (4),  $j_d$  can be calculated, where  $n$  is the number of electrons transferred,  $F$  is the Faraday constant,  $D$  is the diffusion coefficient of the reactant,  $\nu$  is the viscosity of the electrolyte,  $c_0$  is the solubility of H<sub>2</sub> in the electrolyte, and  $\omega$  is the rotating speed. The inverse of the current density at a fixed potential can be linearly fitted with respect to  $\omega^{-1/2}$ , and the intercept of the extrapolated line indicates the inverse of the pure kinetic current density.

### 2. Computational details

DFT calculations were performed using the Vienna Ab initio Simulation Package (VASP) and the Perdew-Burke-Ernzerhof (PBE) exchange-correlation functional correction.<sup>1</sup> The hydrogen binding energy ( $\Delta E_{H^*}$ ) value was obtained using the

following equation:<sup>2</sup>

$$\Delta E_{H^*} = E_{H^*@surface} - E_{surface} - 1/2 E_{H_2} \quad (5)$$

where  $E_{H^*@surface}$  and  $E_{surface}$  are the energies of the H absorbed systems and the clean given surface, respectively, and  $E_{H_2}$  is the energy of molecular  $H_2$  in the gas phase. Atomic relaxation was conducted until the total energy variation was less than  $10^{-6}$  eV and all forces on each atom were less than  $0.01$  eV  $\text{\AA}^{-1}$ . In addition, the electron wave functions were expanded, with a plane wave cutoff of 400 eV.

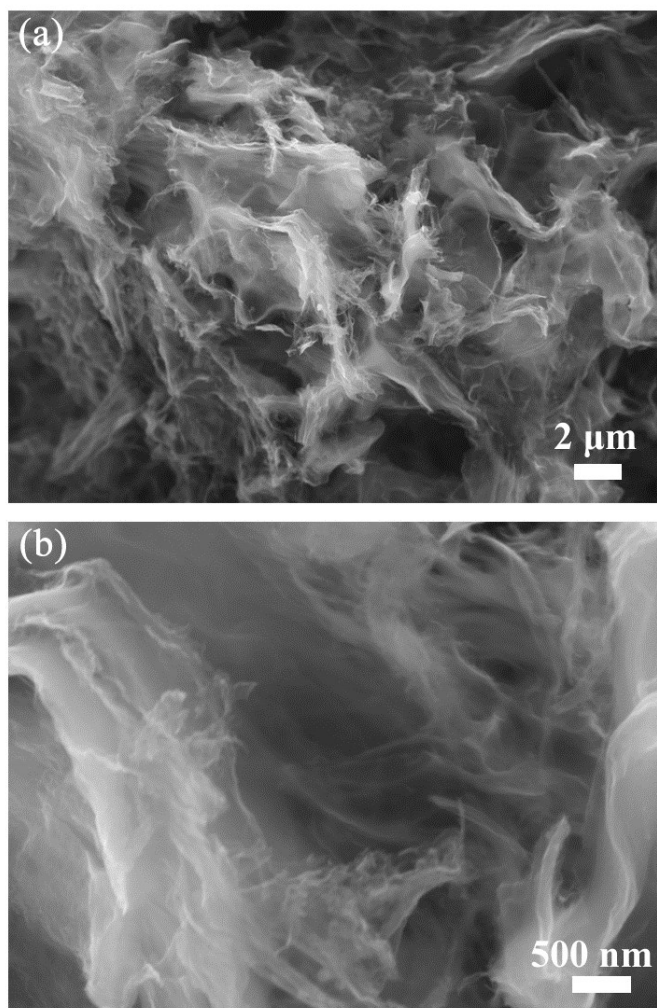

**Figure S1.** SEM images of pure NCS support.

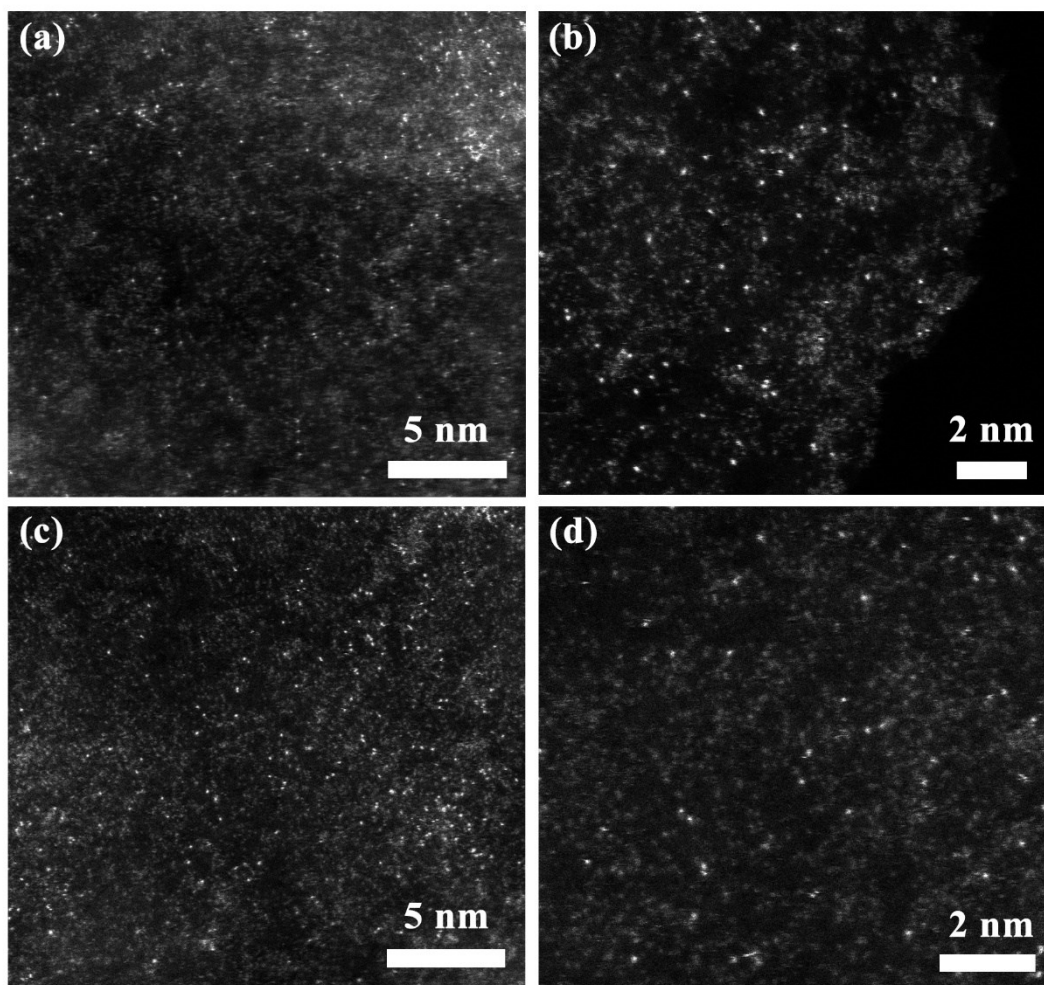

**Figure S2.** HAADF-STEM images of Pt/NCS detected from different sections.

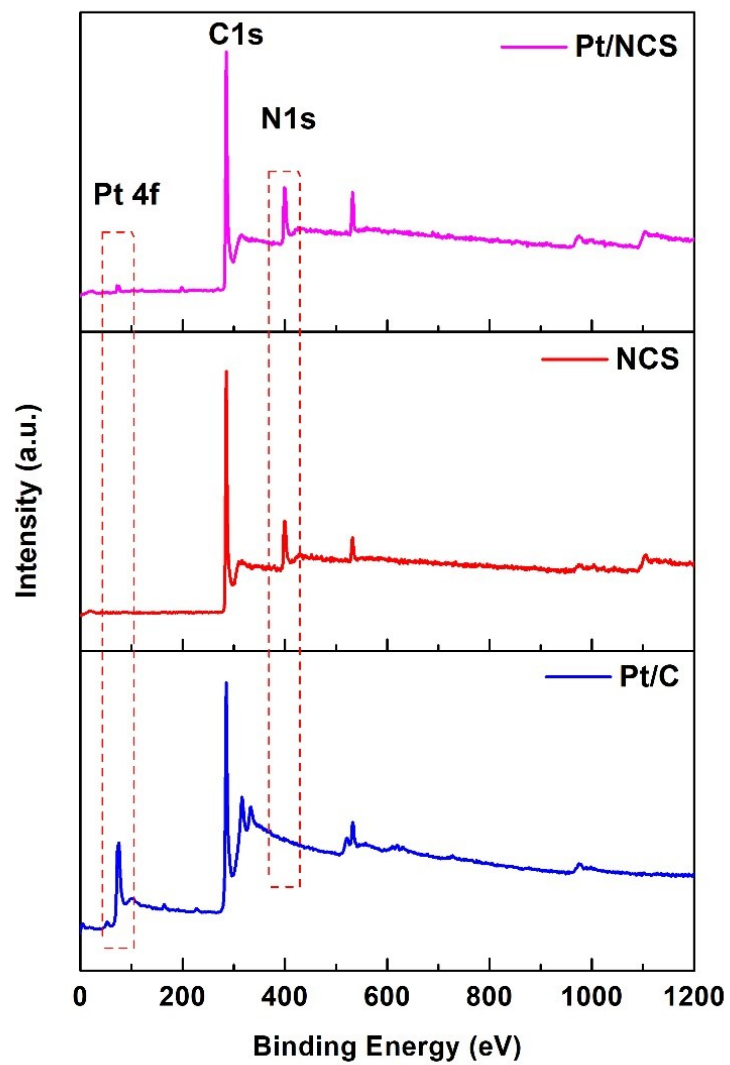

**Figure S3.** XPS survey for commercial Pt/C, NCS support, and Pt/NCS.

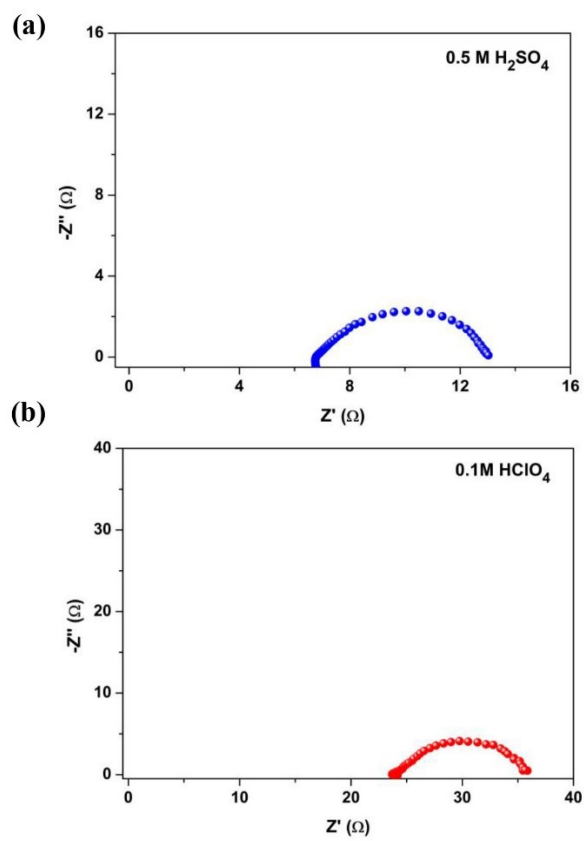

**Figure S4.** Nyquist plots of Pt/NCS at  $-0.05\text{V}$  vs. RHE in (a)  $0.5\text{ M H}_2\text{SO}_4$  and (b)  $0.1\text{ M HClO}_4$  media.

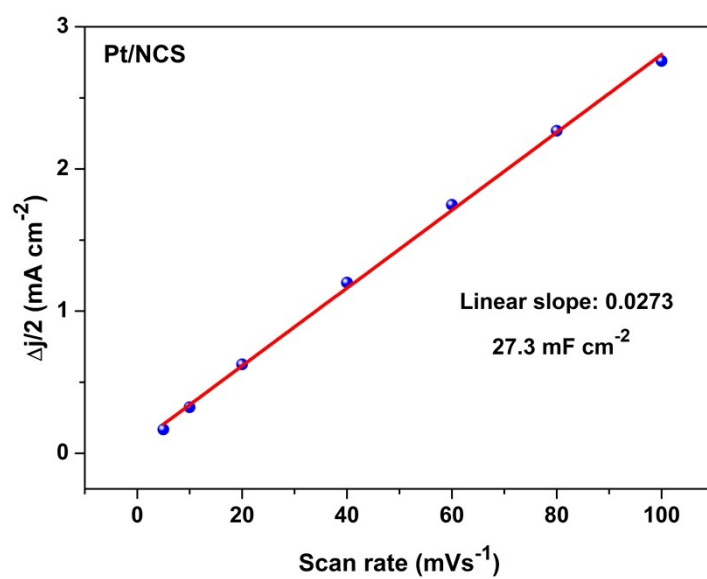

**Figure S5.** Linear fitting for the double-layer capacitance ( $C_{dl}$ ) value of Pt/NCS.



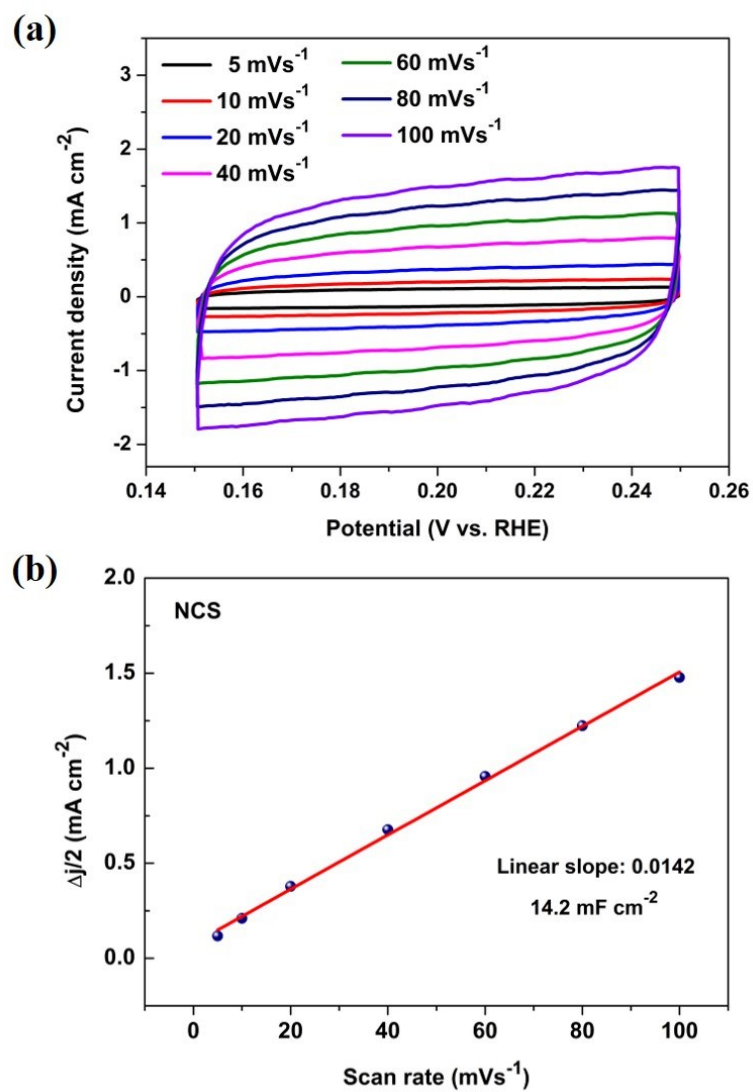

**Figure S6.** (a) CV curves at various scan rates and (b) linear fitting for the double-layer capacitance values of pure NCS.

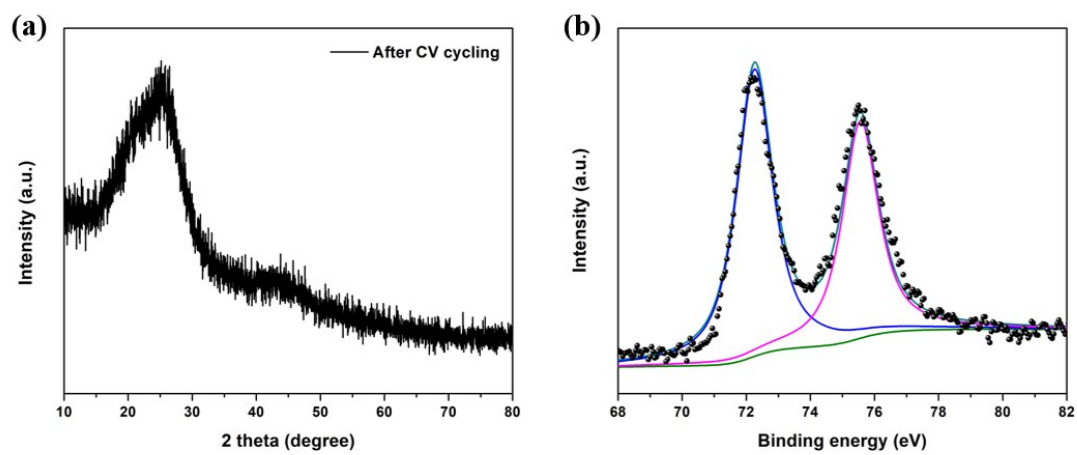

**Figure S7.** (a) XRD and (b) high-resolution Pt 4f patterns of Pt/NCS after 2000 CV cycles testing.

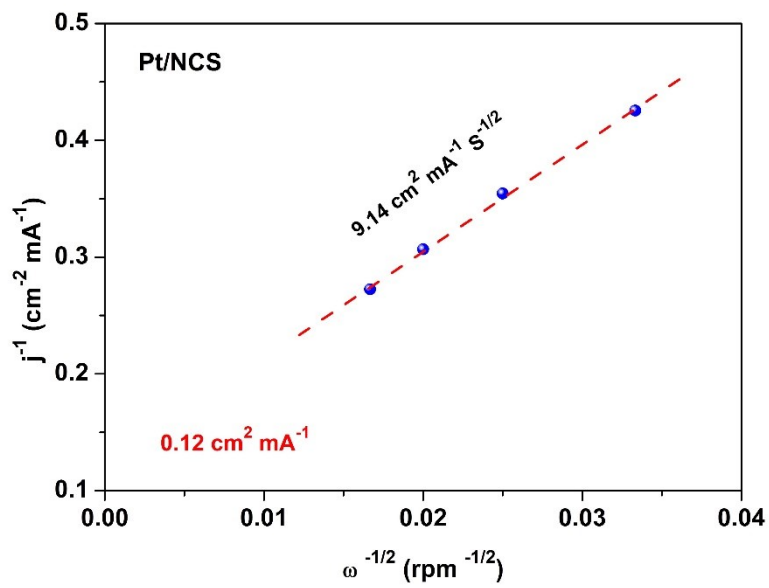

**Figure S8.** Koutecky-Levich plot for the HOR at 0.05 V of Pt/NCS.

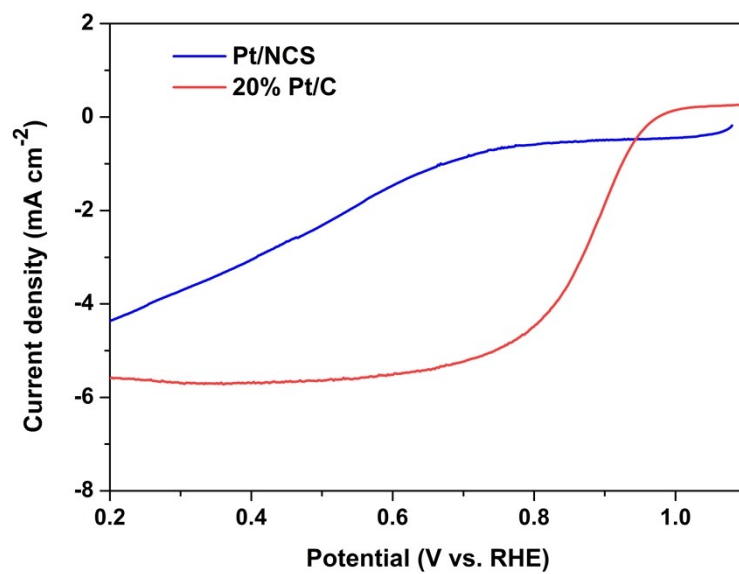

**Figure S9.** Polarization curves of the ORR for Pt/NCS and commercial 20% Pt/C with O<sub>2</sub>-saturated 0.1 M HClO<sub>4</sub>.

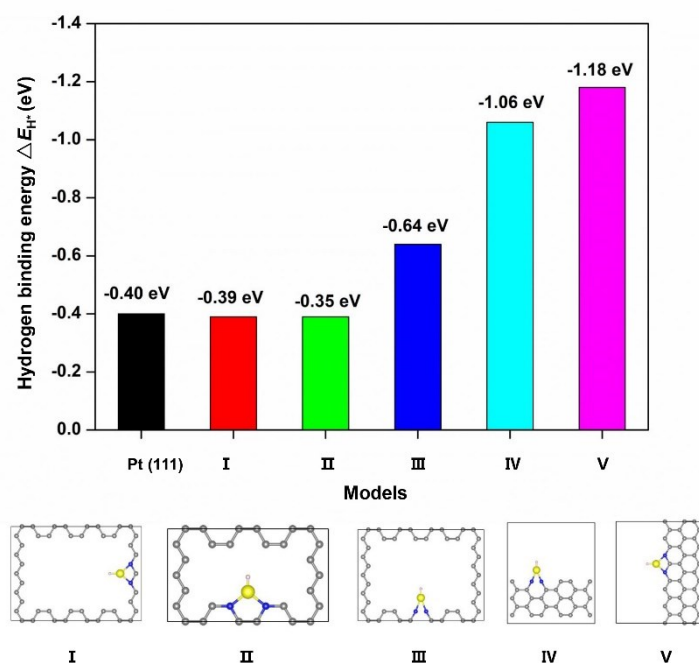

**Figure S10.** The hydrogen binding energy  $\Delta E_{H^*}$  diagram for various Pt/NCS configurations, as well as Pt (111) for comparison. The DFT optimized models are shown on the bottom. The C, N, Pt and H atoms are represented as gray, blue, yellow and white spheres, respectively.

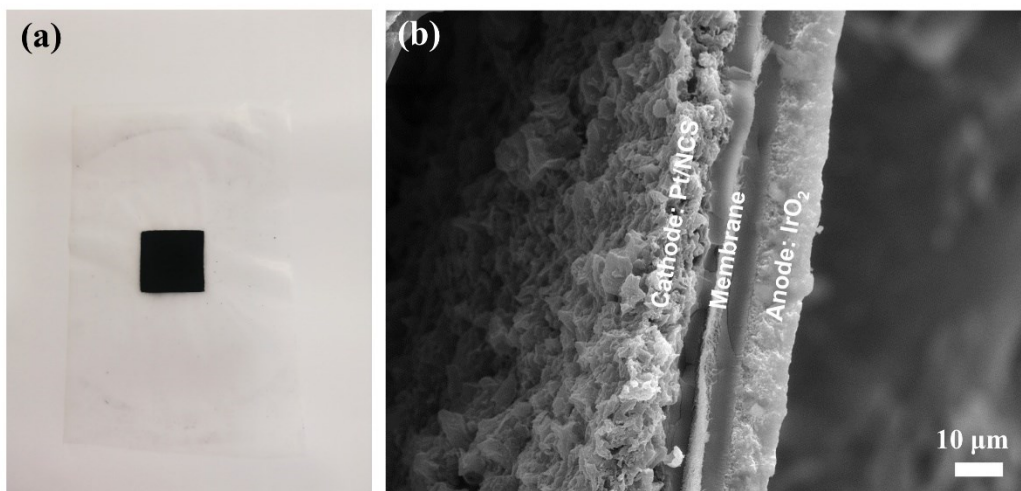

**Figure S11.** (a) Photo of CCM and (b) SEM image of the cross-section using Pt/NCS and IrO<sub>2</sub> as cathode and anode, respectively.

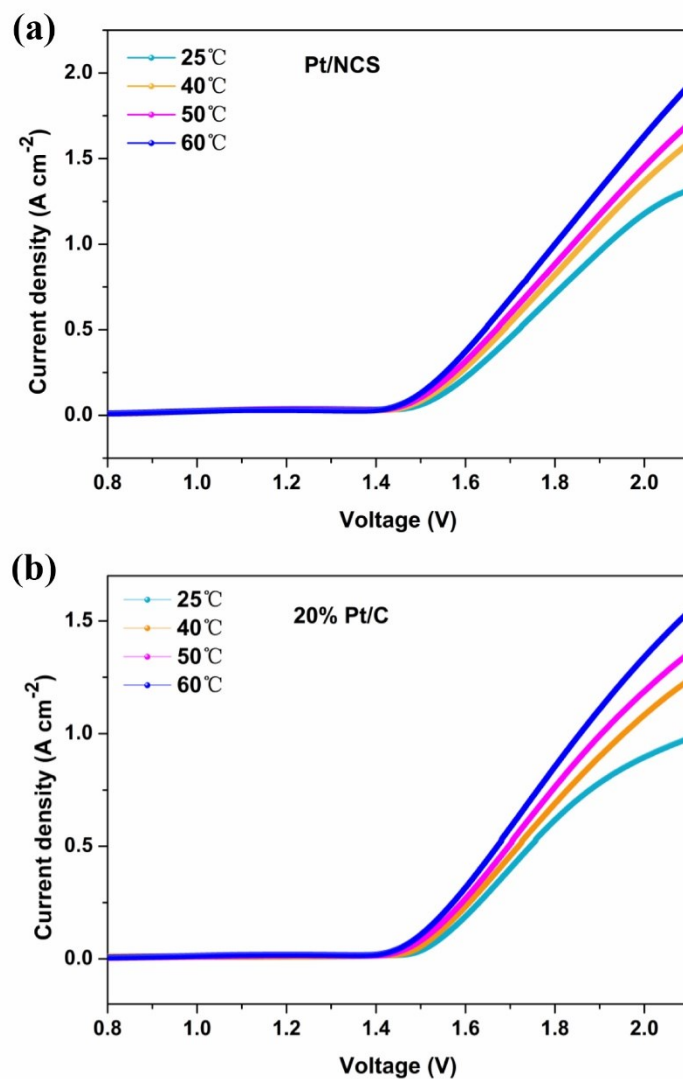

**Figure S12.** Polarization curves obtained with homemade PEM electrolyzer device using (a) Pt/NCS and (b) 20% Pt/C as cathode at various temperatures.

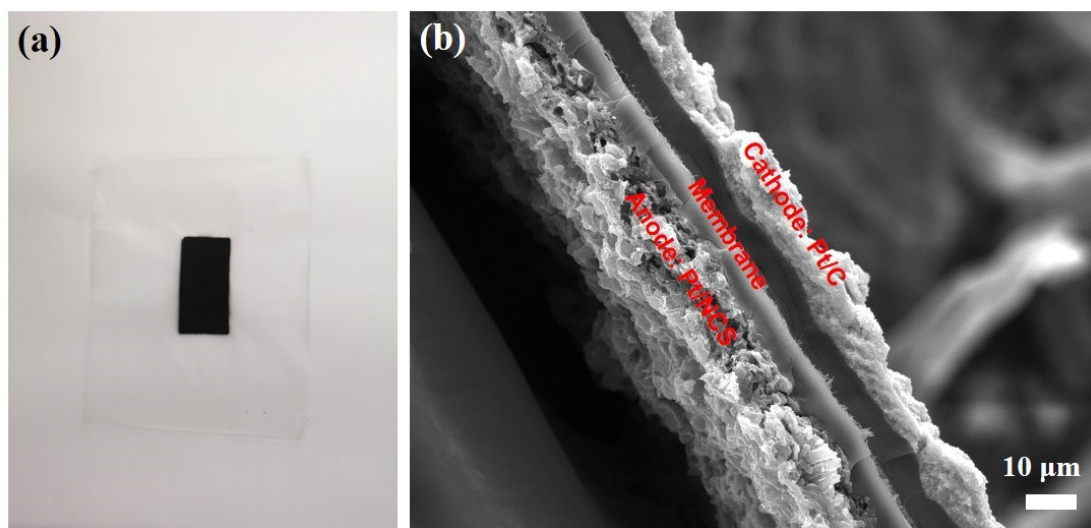

**Figure S13.** (a) Photo of CCM and (b) SEM image of the cross-section using Pt/NCS and commercial 47% Pt/C as anode and cathode, respectively.



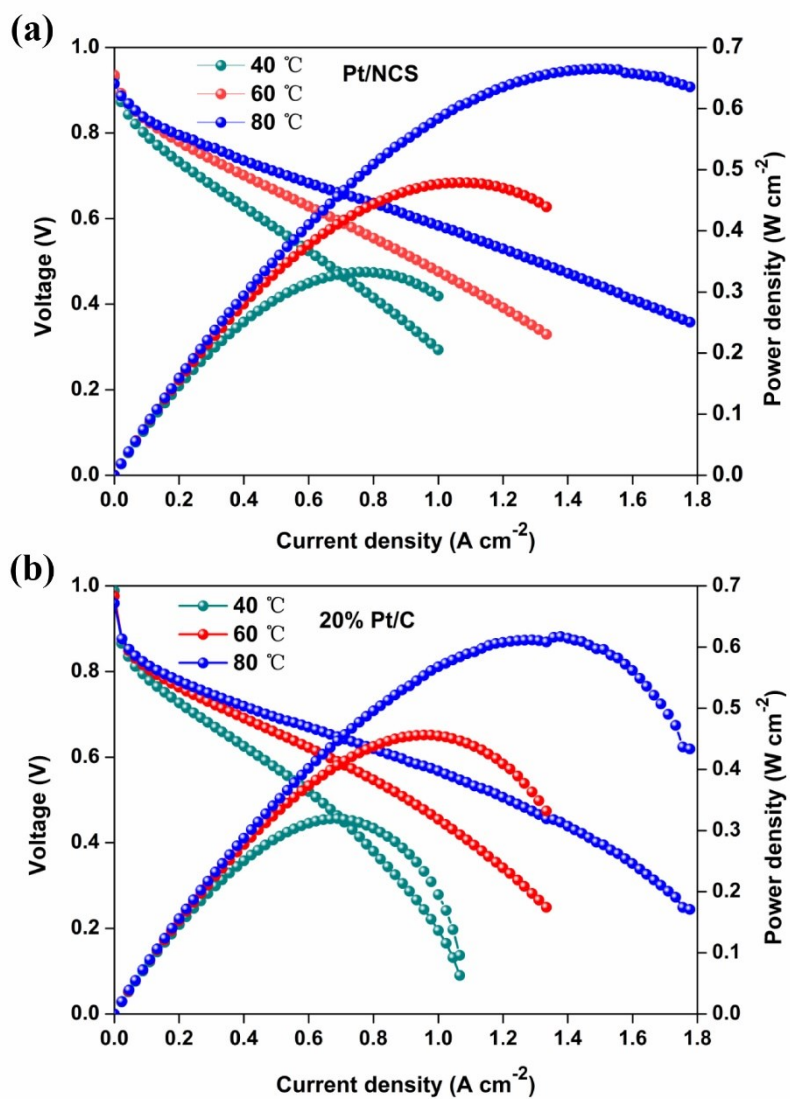

**Figure S14.** Polarization curves obtained with homemade PEM fuel cell device using (a) Pt/NCS and (b) 20% Pt/C as anode at various temperatures.

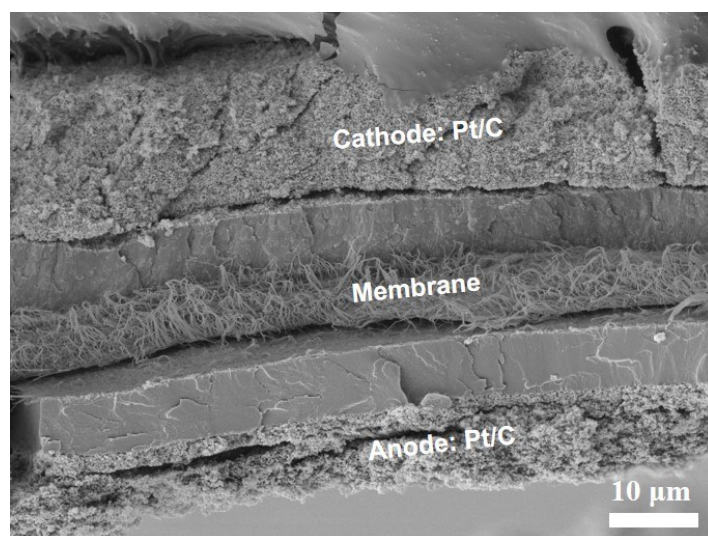

**Figure S15.** SEM image of the cross-section using commercial 20% Pt/C and 47% Pt/C as anode and cathode, respectively.

**Table S1.** EXAFS fitting parameters at the Pt L<sub>3</sub>-edge for Pt/NCS.

| Sample | Shell | CN      | R(Å)      | $\sigma^2$ | $\Delta E_0$ | R factor |
|--------|-------|---------|-----------|------------|--------------|----------|
| Pt/NCS | Pt-N  | 2.0±0.4 | 1.89±0.03 | 0.0045     | 8.7±1.9      | 0.0081   |

Note:

CN: coordination number

R: distance between absorber and backscatter atoms

$\sigma^2$ : Debye–Waller factors

$\Delta E_0$ : inner potential correction

R factor: goodness of the fitting.

**Table S2.** HER performance for recently reported atomically dispersed Pt-based catalysts in acidic medium.

| Sample                                | Overpotential at<br>10 mA cm <sup>-2</sup> (mV) | Tafel slope<br>(mV dec <sup>-1</sup> ) | Pt loading<br>(mg cm <sup>-2</sup> ) | Ref.      |
|---------------------------------------|-------------------------------------------------|----------------------------------------|--------------------------------------|-----------|
| Pt/NCS                                | 18.1 @ 10<br>89.1 @ 100                         | 30                                     | 0.00408                              | This work |
| ALD Pt on<br>NGNs with 50<br>cycles   | 45                                              | NA                                     | 0.00161                              | 3         |
| Pt <sub>1</sub> /NPC                  | 25                                              | 28                                     | 0.0038                               | 4         |
| 400-SWNT/Pt                           | 27                                              | 38                                     | ~0.01942                             | 5         |
| Pt/f-MWCNTs                           | 43.9                                            | 30                                     | 0.000914                             | 6         |
| Pt <sub>1</sub> /hNCNC-<br>2.92       | 15                                              | 24                                     | 0.00287                              | 7         |
| Pt <sub>1</sub> /OLC                  | 38                                              | 36                                     | 0.001377                             | 8         |
| Pt@PCM                                | 105@10<br>142@20                                | 65.3                                   | N.A.                                 | 9         |
| Pt <sub>1</sub> /MC                   | 25                                              | 26                                     | 0.010                                | 10        |
| AC Pt-NG/C                            | 35.2                                            | 27                                     | 0.00566                              | 11        |
| 1-Pt-NG/C                             | 47.2                                            | 31                                     | 0.00283                              | 11        |
| Pt SAs/DG                             | 23                                              | 25                                     | 0.021                                | 12        |
| Pt/NMC-LT                             | 17                                              | 26.3                                   | 0.010                                | 13        |
| Pt <sub>1</sub> /NMC                  | 29                                              | 26                                     | 0.010                                | 14        |
| Pt-SA/ $\alpha$ -MoO <sub>x</sub>     | 19                                              | 123                                    | 0.00168                              | 15        |
| Pt@MoS <sub>2</sub> /NiS <sub>2</sub> | 34                                              | 40                                     | 0.01026                              | 16        |
| Pt/NiS@Al <sub>2</sub> O <sub>3</sub> | 34                                              | 35                                     | 0.01596                              | 17        |
| Pt/np-Co <sub>0.85</sub> Se           | 58                                              | 26                                     | NA                                   | 18        |
| Pt-GDY2                               | ~70                                             | 46.6                                   | 0.00465                              | 19        |

|                                                          |      |    |        |    |
|----------------------------------------------------------|------|----|--------|----|
| Mo <sub>2</sub> TiC <sub>2</sub> TX-<br>Pt <sub>SA</sub> | 30   | 30 | 0.012  | 20 |
| Pt <sub>1</sub> @Fe-N-C                                  | 60   | 42 | 0.0084 | 21 |
| Pd/Cu-Pt<br>nanorings                                    | 22.8 | 25 | 0.0408 | 22 |

## References

1. J. P. Perdew, K. Burke and M. Ernzerhof, *Physical Review Letters*, 1996, **77**, 3865-3868.
2. J. K. Nørskov, T. Bligaard, A. Logadottir, J. R. Kitchin, J. G. Chen, S. Pandelov and U. Stimming, *Journal of The Electrochemical Society*, 2005, **152**, J23.
3. N. Cheng, S. Stambula, D. Wang, M. N. Banis, J. Liu, A. Riese, B. Xiao, R. Li, T. K. Sham, L. M. Liu, G. A. Botton and X. Sun, *Nat Commun*, 2016, **7**, 13638.
4. T. Li, J. Liu, Y. Song and F. Wang, *ACS Catalysis*, 2018, **8**, 8450-8458.
5. M. Tavakkoli, N. Holmberg, R. Kronberg, H. Jiang, J. Sainio, E. I. Kauppinen, T. Kallio and K. Laasonen, *ACS Catalysis*, 2017, **7**, 3121-3130.
6. J. Ji, Y. Zhang, L. Tang, C. Liu, X. Gao, M. Sun, J. Zheng, M. Ling, C. Liang and Z. Lin, *Nano Energy*, 2019, **63**, 103849.
7. Z. Zhang, Y. Chen, L. Zhou, C. Chen, Z. Han, B. Zhang, Q. Wu, L. Yang, L. Du, Y. Bu, P. Wang, X. Wang, H. Yang and Z. Hu, *Nat Commun*, 2019, **10**, 1657.
8. D. Liu, X. Li, S. Chen, H. Yan, C. Wang, C. Wu, Y. A. Haleem, S. Duan, J. Lu, B. Ge, P. M. Ajayan, Y. Luo, J. Jiang and L. Song, *Nature Energy*, 2019, **4**, 512-518.
9. H. Zhang, P. An, W. Zhou, B. Y. Guan, P. Zhang, J. Dong and X. W. Lou, *Science Advances*, 2018, **4**, eaao6657.
10. H. Wei, K. Huang, D. Wang, R. Zhang, B. Ge, J. Ma, B. Wen, S. Zhang, Q. Li, M. Lei, C. Zhang, J. Irawan, L. M. Liu and H. Wu, *Nat Commun*, 2017, **8**, 1490.
11. M. Sun, J. Ji, M. Hu, M. Weng, Y. Zhang, H. Yu, J. Tang, J. Zheng, Z. Jiang, F. Pan, C. Liang and Z. Lin, *ACS Catalysis*, 2019, **9**, 8213-8223.
12. Y. Qu, B. Chen, Z. Li, X. Duan, L. Wang, Y. Lin, T. Yuan, F. Zhou, Y. Hu, Z. Yang, C. Zhao, J. Wang, C. Zhao, Y. Hu, G. Wu, Q. Zhang, Q. Xu, B. Liu, P. Gao, R. You, W. Huang, L. Zheng, L. Gu, Y. Wu and Y. Li, *J Am Chem Soc*, 2019, **141**, 4505-4509.
13. K. Huang, R. Wang, H. Wu, H. Wang, X. He, H. Wei, S. Wang, R. Zhang, M. Lei, W. Guo, B. Ge and H. Wu, *Journal of Materials Chemistry A*, 2019, **7**, 25779-25784.
14. H. Wei, H. Wu, K. Huang, B. Ge, J. Ma, J. Lang, D. Zu, M. Lei, Y. Yao, W. Guo and H. Wu, *Chem Sci*, 2019, **10**, 2830-2836.
15. J. Xu, C. Zhang, H. Liu, J. Sun, R. Xie, Y. Qiu, F. Lü, Y. Liu, L. Zhuo, X. Liu and J. Luo, *Nano Energy*, 2020, **70**, 104529.
16. Y. Guan, Y. Feng, J. Wan, X. Yang, L. Fang, X. Gu, R. Liu, Z. Huang, J. Li, J. Luo, C. Li and Y. Wang, *Small*, 2018, **14**, e1800697.
17. Y. Feng, Y. Guan, H. Zhang, Z. Huang, J. Li, Z. Jiang, X. Gu and Y. Wang, *Journal of Materials Chemistry A*, 2018, **6**, 11783-11789.
18. K. Jiang, B. Liu, M. Luo, S. Ning, M. Peng, Y. Zhao, Y. R. Lu, T. S. Chan, F. M. F. de Groot and Y. Tan, *Nat Commun*, 2019, **10**, 1743.
19. X. P. Yin, H. J. Wang, S. F. Tang, X. L. Lu, M. Shu, R. Si and T. B. Lu, *Angew Chem Int Ed Engl*, 2018, **57**, 9382-9386.
20. J. Zhang, Y. Zhao, X. Guo, C. Chen, C.-L. Dong, R.-S. Liu, C.-P. Han, Y. Li, Y. Gogotsi and G. Wang, *Nature Catalysis*, 2018, **1**, 985-992.
21. X. Zeng, J. Shui, X. Liu, Q. Liu, Y. Li, J. Shang, L. Zheng and R. Yu, *Advanced Energy Materials*, 2018, **8**, 1701345.
22. T. Chao, X. Luo, W. Chen, B. Jiang, J. Ge, Y. Lin, G. Wu, X. Wang, Y. Hu, Z. Zhuang, Y.

Wu, X. Hong and Y. Li, *Angew Chem Int Ed Engl*, 2017, **56**, 16047-16051.
